# Supplementary material
Source: bioRxiv or medRxiv preprint supplement (https://www.biorxiv.org/highwire/filestream/98958/field_highwire_adjunct_files/3/324194-3.pdf)
Supplement: Supplementary file [file 324194-3.pdf]

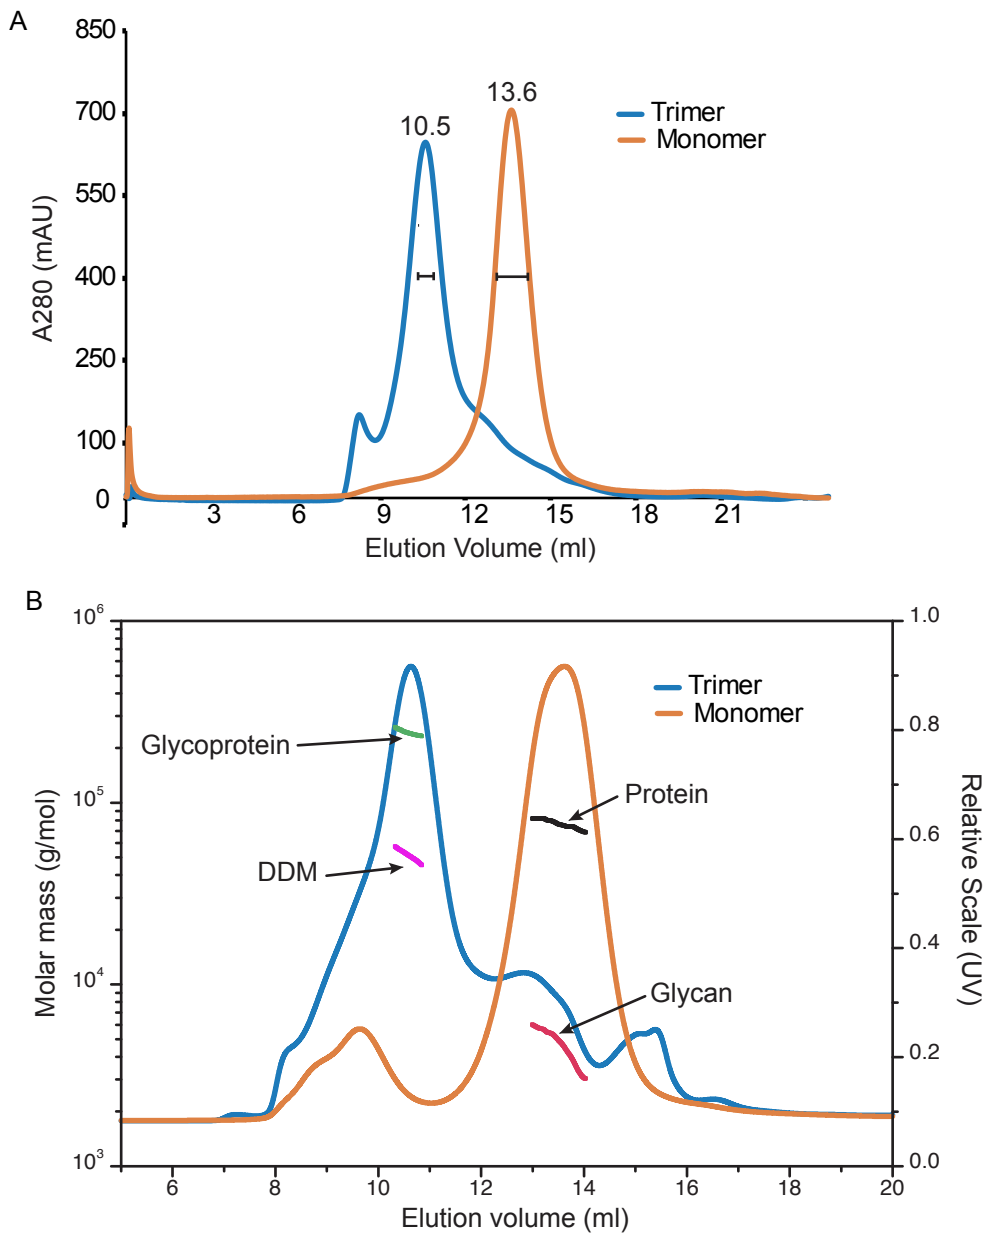

**C**

| Component               | Monomer         | Trimer           |
|-------------------------|-----------------|------------------|
| Protein molar mass      | 76.5 kDa        |                  |
| Fitting error           | ( $\pm 2.6\%$ ) |                  |
| Glycan molar mass       | 4.7 kDa         |                  |
| Fitting error           | ( $\pm 45\%$ )  |                  |
| Glycoprotein molar mass | 81.2 kDa        | 243.1 kDa        |
| Fitting error           | ( $\pm 2.6\%$ ) | ( $\pm 0.24\%$ ) |
| DDM micelle molar mass  | —               | 51.4 kDa         |
| Fitting error           |                 | ( $\pm 1.4\%$ )  |

**Supplemental Fig. 1**
